# Supplementary material
Source: PubMed Central journal article supplement (PMC2546538)
Supplement: M803337200_1.pdf [file M803337200_1.pdf]

**Supplementary Table 1: Proteins identified in HT-1080 intravasation variants by LC-MS/MS analysis of cell-surface biotinylated fraction.** Percent coverage and number of peptides identified per protein are as indicated. Proteins identified in the non-labeled control were excluded from analysis. The table presents 3 separate lists of proteins identified either in both variants or in each individual variant. HT-hi/diss results represent an average of 2 samples analyzed, HT-lo/diss results are from 1 sample.

| HT-hi/diss |          | HT-lo/diss |          | Protein Identified                                                                       |
|------------|----------|------------|----------|------------------------------------------------------------------------------------------|
| Coverage   | Peptides | Coverage   | Peptides |                                                                                          |
| 54.35      | 7.5      | 100        | 15       | 60S acidic ribosomal protein P2                                                          |
| 66.1       | 22       | 78.9       | 28       | Transgelin-2                                                                             |
| 53.95      | 24       | 64.5       | 35       | Cofilin 1 (non-musCle)                                                                   |
| 47.95      | 27.5     | 58.4       | 60       | Basigin (Splice Isoform 2)                                                               |
| 31.3       | 18       | 56.9       | 21       | ALDOA protein                                                                            |
| 63         | 104      | 56.1       | 80       | Tubulin alpha-6 chain                                                                    |
| 35.85      | 22.5     | 52.9       | 19       | 14-3-3 protein epsilon                                                                   |
| 23.7       | 5.5      | 45.9       | 9        | Reticulocalbin 1                                                                         |
| 48.75      | 10       | 43.7       | 13       | Beta-2-microglobulin                                                                     |
| 18.4       | 6        | 42.5       | 12       | Lactate dehydrogenase A                                                                  |
| 27.15      | 14       | 42.4       | 19       | Stress-induced-phosphoprotein 1 78 kDa protein                                           |
| 47.65      | 119      | 40         | 59       | Tubulin alpha-1 chain                                                                    |
| 34.75      | 17.5     | 39.6       | 19       | Adenylyl cyclase-Associated protein                                                      |
| 39.1       | 44       | 39.1       | 42       | CD59 glycoprotein                                                                        |
| 47         | 18.5     | 39.1       | 16       | Eukaryotic initiation factor 5A isoform I variant A                                      |
| 38.8       | 37       | 38.6       | 30       | Melanotransferrin (Splice Isoform 1)                                                     |
| 32.8       | 10.5     | 37.7       | 18       | HMG-1                                                                                    |
| 38         | 41.5     | 36.5       | 57       | Splice Isoform 1 Of Beta-catenin                                                         |
| 37.65      | 4        | 36         | 3        | Cytochrome c oxidase polypeptide Va, mitochondrial                                       |
| 25.9       | 6.5      | 35.9       | 10       | Calumenin (Splice Isoform 1)                                                             |
| 41.7       | 7        | 33.7       | 4        | ADP-ribosylation factor 3                                                                |
| 29.7       | 42       | 33.2       | 16       | HLA class I histocompatibility antigen, A-31 alpha chain                                 |
| 38.35      | 89       | 32.6       | 67       | Hypothetical protein FLJ44324                                                            |
| 24.35      | 74       | 32.6       | 51       | HLA class I histocompatibility antigen, A-2 alpha chain                                  |
| 19.7       | 40.5     | 32.6       | 18       | HLA class I histocompatibility antigen, A-68 alpha chain                                 |
| 28.9       | 72.5     | 32.3       | 52       | HLA class I histocompatibility antigen, A-33 alpha chain                                 |
| 22.65      | 5        | 32         | 5        | S100A10 protein                                                                          |
| 29.75      | 21.5     | 31.9       | 26       | Protein disulfide-isomerase                                                              |
| 30.45      | 7.5      | 31.7       | 5        | Catechol O-methyltransferase Catechol-O-methyltransferase isoform S-COMT                 |
| 32.1       | 16.5     | 30.5       | 11       | Tyrosine 3-monooxygenase/Tryptophan 5-monooxygenase activation protein, beta polypeptide |
| 13.65      | 7.5      | 30.4       | 22       | Protein disulfide-isomerase A4                                                           |
| 22.75      | 24       | 30         | 11       | G22P1 protein                                                                            |
| 24.1       | 5.5      | 28.8       | 4        | Telomerase-binding protein p23 19 kDa protein                                            |
| 23.15      | 21.5     | 28.6       | 23       | Alpha-actinin 1                                                                          |
| 17.4       | 4.5      | 28.4       | 6        | Lactate dehydrogenase B                                                                  |
| 15.1       | 5        | 28.3       | 9        | Urokinase-type plasminogen activator                                                     |
| 23.4       | 24       | 27.5       | 21       | Neural cell adhesion molecule 1, 140 kDa isoform                                         |
| 22.85      | 7        | 27.4       | 8        | Hypothetical protein FLJ10856                                                            |
| 24.9       | 9.5      | 27.3       | 9        | Ribosomal protein L7                                                                     |
| 25.25      | 10       | 26.5       | 13       | Rab GDP dissociation inhibitor beta                                                      |
| 20         | 20       | 26.1       | 27       | Alpha-actinin 4                                                                          |
| 25.45      | 84.5     | 26         | 93       | Hypothetical protein DKFZp451K1918                                                       |
| 24.85      | 11       | 25.9       | 9        | Eukaryotic translation initiation factor 3 subunit 3                                     |
| 25.15      | 16.5     | 25.5       | 13       | Heterogeneous nuclear ribonucleoprotein A1 isoform b                                     |
| 26.5       | 7.5      | 25.2       | 9        | Glioma pathogenesis-related protein 1                                                    |
| 37.8       | 76.5     | 25.2       | 39       | Ephrin type-A receptor 2                                                                 |
| 24.7       | 25       | 24.6       | 19       | Discoidin, CUB and LCCL domain containing protein 2 (Splice Isoform 1,2)                 |
| 9.85       | 2.5      | 24.5       | 5        | Thioredoxin-like protein 2                                                               |
| 16.9       | 17.5     | 24.2       | 22       | Desmoglein 2                                                                             |
| 43.9       | 102      | 24.2       | 11       | Glyceraldehyde-3-phosphate dehydrogenase                                                 |
| 18.3       | 6.5      | 24.1       | 6        | B7-H1                                                                                    |
| 16.6       | 5.5      | 23.8       | 6        | CHORD containing protein-1                                                               |

|       |      |      |    |                                                                                                                    |
|-------|------|------|----|--------------------------------------------------------------------------------------------------------------------|
| 11.35 | 11   | 23.7 | 12 | Tissue factor                                                                                                      |
| 31.4  | 14   | 23.7 | 10 | 14-3-3 protein tau                                                                                                 |
| 27.65 | 3    | 23.2 | 5  | Ribosomal pRotein S29                                                                                              |
| 13.5  | 3.5  | 23.1 | 8  | DnaJ homolog subfamily A member 2                                                                                  |
| 16.65 | 6.5  | 23.1 | 6  | Cation-dependent mannose-6-phosphate receptor                                                                      |
| 22.1  | 24   | 23   | 22 | Integrin beta-5                                                                                                    |
| 23.05 | 9.5  | 22.6 | 13 | Amphoterin induced gene 2                                                                                          |
| 25.5  | 13.5 | 22.1 | 5  | Tumor necrosis factor receptor superfamily member 6 (Splice Isoform 1,6)                                           |
| 20.9  | 32.5 | 21   | 19 | Ephrin type-B receptor 2 (Splice Isoform 1, 2)                                                                     |
| 34.7  | 7.5  | 20.9 | 6  | AdenylAte kinAse 2 (isoform A, B)                                                                                  |
| 29.1  | 4    | 20.6 | 2  | 60S ribosomal protein L12                                                                                          |
| 32.15 | 25   | 20.4 | 16 | Hypothetical protein                                                                                               |
| 19.7  | 8    | 20.3 | 6  | Urokinase plasminogen activator surface receptor (Splice Isoform I)                                                |
| 11.1  | 7    | 20.2 | 14 | Tumor necrosis factor receptor superfamily member 10B (Splice Isoform 1,2),<br>Hypothetical protein DKFZp686A24188 |
| 21.75 | 4    | 19.8 | 4  | Major prion protein , Prion protein                                                                                |
| 9.1   | 3    | 19.3 | 7  | Heterogeneous nuclear ribonucleoprotein Q (Splice Isoform 1,3)                                                     |
| 21.95 | 16.5 | 19.3 | 14 | Villin 2                                                                                                           |
| 13.55 | 7.5  | 19.2 | 10 | HNRPA2B1 protein 37 kDa protein Heterogeneous nuclear ribonucleoproteins A2/B1 (Splice Isoform 1,2)                |
| 20.65 | 5.5  | 18.9 | 7  | Mannose 6 phosphate receptor binding protein 1                                                                     |
| 17.55 | 2.5  | 18.9 | 2  | Calcyclin-binding protein (Splice Isoform 1)                                                                       |
| 5.9   | 5.5  | 18.8 | 21 | Ectonucleotide pyrophosphatase/phosphodiesterase 1                                                                 |
| 21.55 | 18.5 | 18.8 | 14 | Endothelin-converting enzyme 1 (Splice Isoform 1,3,4)                                                              |
| 21    | 9.5  | 18.5 | 8  | HLA class I histocompatibility antigen, alpha chain H                                                              |
| 13.9  | 4.5  | 18.2 | 2  | 39S ribosomal protein L12, mitochondrial 19 kDa protein                                                            |
| 12.75 | 6    | 18.2 | 10 | Discoidin, CUB and LCCL domain containing protein 1                                                                |
| 8.85  | 2.5  | 18.1 | 6  | Stromal cell-derived receptor-1 alpha and beta                                                                     |
| 12.2  | 10   | 18.1 | 4  | HLA class I histocompatibility antigen, A-80 alpha chain                                                           |
| 13.2  | 3    | 17.9 | 4  | FK506-binding protein 3                                                                                            |
| 16.3  | 3.5  | 17.9 | 4  | MIC2L1 isoform E4, E3-E4, E3'-E4'-E3-E4                                                                            |
| 18.85 | 8.5  | 17.1 | 7  | UMP-CMP kinase                                                                                                     |
| 11.2  | 4    | 17.1 | 7  | Protein tyrosine PhosPhatase, non-recePtor tyPe substrate 1 44 kDa protein                                         |
| 17.1  | 2.5  | 17.1 | 4  | Hypothetical protein FLJ43237                                                                                      |
| 26.4  | 15.5 | 17   | 5  | Lung cancer oncogene 7                                                                                             |
| 18.3  | 8.5  | 16.9 | 9  | Hypothetical protein FLJ44113                                                                                      |
| 14.4  | 8    | 16.7 | 14 | Neural-cadherin                                                                                                    |
| 20.85 | 6    | 16.4 | 8  | DNA-binding protein A (Splice Isoform 1,3)                                                                         |
| 13.4  | 7.5  | 16.3 | 14 | HLA class I histocompatibility antigen, B-27 alpha chain                                                           |
| 22.3  | 8    | 16   | 2  | 22 kDa protein                                                                                                     |
| 12.55 | 5    | 15.9 | 5  | T-complex protein 1, delta subunit                                                                                 |
| 17.5  | 21.5 | 15.9 | 16 | Epidermal growth factor receptor (Splice Isoform 1)                                                                |
| 7.45  | 3    | 15.7 | 8  | Nectin 3                                                                                                           |
| 17.9  | 5.5  | 15.2 | 6  | Actin-like protein 2; Actin-relAteD protein 2 isoform A                                                            |
| 15.25 | 5.5  | 15.2 | 5  | Ras-GTPase-activating protein binding protein 1                                                                    |
| 10.95 | 3    | 15.2 | 4  | Septin 2                                                                                                           |
| 12.4  | 3.5  | 15   | 3  | Proliferation-associated protein 2G4                                                                               |
| 14.8  | 8    | 14.8 | 8  | Poliovirus receptor (Splice Isoform 1-4)                                                                           |
| 10.45 | 4.5  | 14.8 | 5  | Neurotrimin (Splice Isoform 1-3)                                                                                   |
| 6.2   | 3    | 14.7 | 8  | Neuronal growth regulator 1; 39 kDa protein                                                                        |
| 8.9   | 3    | 14.7 | 3  | Serine/threonine-protein kinase PAK 2 P21-activated kinase 2                                                       |
| 19.05 | 8.5  | 14.5 | 6  | 26S proteasome non-ATPase regulatory subunit 14                                                                    |
| 11.45 | 5.5  | 14.4 | 5  | Lysyl-tRNA synthetase Lysyl-tRNA synthetase                                                                        |
| 18.1  | 2.5  | 14.4 | 2  | 19 kDa protein                                                                                                     |
| 14.3  | 6.5  | 14.2 | 3  | Butyrophilin                                                                                                       |

|       |      |      |    |                                                                                                                    |
|-------|------|------|----|--------------------------------------------------------------------------------------------------------------------|
| 16.95 | 24.5 | 14.1 | 16 | Integrin alpha-V                                                                                                   |
| 19.35 | 36   | 14   | 17 | CD109                                                                                                              |
| 17.6  | 13.5 | 13.8 | 11 | 5T4 oncofoetal antigen                                                                                             |
| 18.55 | 14.5 | 13.5 | 9  | Moesin 67 kDa protein                                                                                              |
| 9.75  | 5    | 13.3 | 6  | SKD2 protein                                                                                                       |
| 16.65 | 7.5  | 13.2 | 3  | Lupus La protein                                                                                                   |
| 7.2   | 2.5  | 12.6 | 4  | Retinol dehydrogenase 11 (Splice Isoform 1,2)                                                                      |
| 12.8  | 13   | 11.7 | 6  | Endoglin (Splice Isoform 1,2)                                                                                      |
| 12.25 | 11   | 11.6 | 11 | Vinculin isoform meta-VCL                                                                                          |
| 8.2   | 3.5  | 11.5 | 8  | Eukaryotic translation initiation factor 4B                                                                        |
| 14.05 | 14.5 | 11.3 | 8  | Endothelial protein C receptor                                                                                     |
| 21.5  | 21   | 11.2 | 21 | Cadherin-13                                                                                                        |
| 10.35 | 3.5  | 11.1 | 3  | Eukaryotic translation initiation factor 2, subunit 1 alpha, 35kDa                                                 |
| 6.75  | 5.5  | 11   | 7  | Ubiquitin-activating enzyme E1                                                                                     |
| 10.7  | 10   | 10.9 | 7  | Low-density lipoprotein receptor                                                                                   |
| 15.8  | 5    | 10.8 | 2  | Protein zero related protein                                                                                       |
| 10.35 | 11.5 | 10.6 | 9  | Prostaglandin F2 receptor negative regulator                                                                       |
| 18.95 | 2.5  | 10.6 | 4  | ATP synthase, H+ transporting, mitochondrial F0 complex, subunit d isoform a,b                                     |
| 19.1  | 6    | 10.2 | 3  | Hypothetical protein FLJ90529                                                                                      |
| 28    | 2.5  | 10.1 | 2  | DC50                                                                                                               |
| 13.8  | 8.5  | 10   | 8  | Valosin-containing protein, 89 kDa protein                                                                         |
| 12.7  | 11   | 10   | 5  | EBNA-2 co-activator                                                                                                |
| 7.35  | 2.5  | 9.9  | 2  | Hypothetical protein DKFZp564E242                                                                                  |
| 14.55 | 7.5  | 9.7  | 5  | Membrane cofactor protein (Splice Isoform 1,10-15)                                                                 |
| 11.4  | 12   | 9.6  | 9  | Neutral alpha-glucosidase AB (Splice Isoform 1,2); 107 kDa protein                                                 |
| 10.2  | 5.5  | 9.6  | 4  | Anthrax toxin receptor 1 (Splice Isoform 1)                                                                        |
| 9.25  | 2.5  | 9.6  | 2  | COP9 signalosome complex subunit 4                                                                                 |
| 5.3   | 6.5  | 9.6  | 14 | KIAA1412 protein                                                                                                   |
| 12.6  | 14.5 | 9.4  | 8  | Dihydropyridine receptor alpha 2 subunit; Dihydropyridine-sensitive L-type, calcium channel alpha-2/delta subunits |
| 16.4  | 6    | 9.3  | 3  | NADH-ubiquinone oxidoreductase 49 kDa subunit, mitochondrial                                                       |
| 9.3   | 4    | 9.3  | 2  | Hypothetical protein DKFZp686I04222                                                                                |
| 8.6   | 4    | 8.9  | 3  | Eukaryotic translation initiation factor 3 subunit 2                                                               |
| 10.85 | 4    | 8.7  | 2  | ATP-binding cassette sub-family E member 1                                                                         |
| 10.1  | 2.5  | 8.6  | 2  | Eukaryotic translation initiation factor 5                                                                         |
| 11.1  | 4.5  | 8.5  | 4  | FK506-binding protein 4                                                                                            |
| 24.6  | 5    | 8.4  | 2  | Bifunctional methylenetetrahydrofolate dehydrogenase/cyclohydrolase, mitochondrial                                 |
| 8.3   | 19.5 | 8.4  | 16 | PREDICTED: similar to plexin A1                                                                                    |
| 9.8   | 4    | 8.3  | 2  | Tryptophanyl-tRNA synthetase                                                                                       |
| 8.55  | 16   | 8.2  | 21 | Heat shock 70 kDa protein 6                                                                                        |
| 9.05  | 5.5  | 8.1  | 6  | Semaphorin C                                                                                                       |
| 9.05  | 4    | 8    | 4  | Glucose-6-phosphate dehydroGenase                                                                                  |
| 12.2  | 6.5  | 8    | 3  | Tyrosyl-TRNA synTheTase                                                                                            |
| 5.45  | 3    | 7.7  | 5  | Procollagen-lysine,2-oxoglutarate 5-dioxygenase 1                                                                  |
| 9.4   | 3.5  | 7.7  | 3  | Similar to expressed sequence AA536743                                                                             |
| 11.4  | 3.5  | 7.7  | 2  | UDP-N-acetylhexosamine pyrophosphorylase; UDP-N-acteylglucosamine pyrophosphorylase 1                              |
| 10    | 2    | 7.6  | 2  | PARP1 protein                                                                                                      |
| 11.95 | 15   | 6.9  | 8  | Hepatocyte growth factor receptor (Splice Isoform 1, 2)                                                            |
| 5.95  | 2.5  | 6.8  | 3  | Glucosidase II beta subunit ; Protein kinase C substrate 80K-H isoform 1                                           |
| 6.4   | 2.5  | 6.8  | 3  | Growth-arrest-specific protein 6 (Splice Isoform 1-3)                                                              |
| 12.2  | 8    | 6.7  | 2  | CD97 antigen (Splice Isoform 1-3)                                                                                  |
| 8.85  | 12   | 6.7  | 12 | PREDICTED: KIAA0527 protein                                                                                        |
| 2.7   | 3    | 6.6  | 4  | Major vault protein                                                                                                |
| 5.35  | 4    | 6.4  | 5  | Neuropilin-2 (Splice Isoform 1-3); Neuropilin-2b                                                                   |
| 5.95  | 6    | 6.3  | 9  | LAR                                                                                                                |

|       |      |     |    |                                                                                          |
|-------|------|-----|----|------------------------------------------------------------------------------------------|
| 10.4  | 3.5  | 6   | 2  | Anthrax toxin receptor 2 (Splice Isoform 1,2,4)                                          |
| 2.65  | 4    | 5.8 | 7  | Receptor-type tyrosine-protein phosphatase kappa                                         |
| 8.35  | 3    | 5.8 | 2  | Asparaginyl-tRNA synthetase, cytoplasmic                                                 |
| 6.15  | 3    | 5.7 | 2  | Leukemia virus receptor 1                                                                |
| 12.2  | 15.5 | 5.7 | 10 | KIAA0709 protein                                                                         |
| 8.75  | 5.5  | 5.6 | 6  | Microtubule-associated protein, RP/EB family, Member 1                                   |
| 6.25  | 15   | 5.4 | 9  | Cation-independent mannose-6-phosphate receptor                                          |
| 10.15 | 4.5  | 5.4 | 2  | Heterogeneous nuclear ribonucleoprotein D0 (Splice Isoform 1-4), 28 kDa protein P37 AUF1 |
| 10.05 | 17.5 | 5.1 | 8  | Melanoma-associated chondroitin sulfate proteoglycan                                     |
| 6.8   | 4    | 5.1 | 5  | Zinc transporter 1                                                                       |
| 8.95  | 3.5  | 4.8 | 2  | Peroxisomal multifunctional enzyme type 2                                                |
| 3.4   | 2.5  | 4.7 | 4  | Golgi apparatus protein 1                                                                |
| 12    | 13.5 | 4.7 | 3  | Receptor-type tyrosine-protein phosphatase gamma                                         |
| 4.05  | 2    | 4.6 | 2  | Leprecan-like 2 protein Protein B                                                        |
| 2.9   | 2.5  | 4.3 | 4  | UDP-glucose:glycoprotein glucosyltransferase 1                                           |
| 3.45  | 4    | 4.1 | 4  | Plasma membrane calcium-transporting ATPase 1 (Splice Isoform 1,3,4,6)                   |
| 4.85  | 3    | 3.9 | 3  | DEAH (Asp-Glu-Ala-His) box polypeptide 15 Putative pre-mRNA splicing factor RNA helicase |
| 4.45  | 2.5  | 3.8 | 2  | Succinate dehydrogenase [ubiquinone] flavoprotein subunit, mitochondrial                 |
| 9.7   | 11   | 3.6 | 2  | ADAM 10                                                                                  |
| 3.85  | 2.5  | 3.6 | 2  | Band 4.1-like protein 2                                                                  |
| 5.65  | 5    | 3.6 | 2  | GBP protein isoform a                                                                    |
| 7.5   | 4    | 3.4 | 2  | Hedgehog-interacting protein                                                             |
| 6.9   | 6    | 3.2 | 2  | Discoidin domain receptor 2                                                              |
| 8.05  | 5    | 3.2 | 2  | Alpha-1 catenin Alpha2(E)-catenin                                                        |
| 2.85  | 2.5  | 3.1 | 4  | Tyrosine-protein kinase transmembrane receptor ROR1 (Splice Isoform 1)                   |
| 27.55 | 37.5 | 3   | 5  | Vimentin                                                                                 |
| 4.6   | 2.5  | 2.7 | 3  | ADAM 17 (Splice Isoform 1,2)                                                             |
| 4.95  | 5.5  | 2.7 | 3  | PREDICTED: plexin B2                                                                     |
| 3.2   | 2.5  | 2.1 | 3  | Netrin receptor UNC5B (Splice Isoform 1,2)                                               |
| 3.05  | 5    | 1.7 | 2  | PREDICTED: odz, odd Oz/ten-m homolog 2                                                   |
| 6.7   | 6    | 1.5 | 2  | ADAM 9 (Splice Isoform 1)                                                                |
| 5.65  | 5.5  | 1.4 | 3  | Hypothetical protein FLJ43909                                                            |
| 1.3   | 4    | 0.7 | 2  | Low-density lipoprotein receptor-related protein 1                                       |

| HT-hi/diss |          | HT-lo/diss |          | Protein Identified                                                                                       |
|------------|----------|------------|----------|----------------------------------------------------------------------------------------------------------|
| Coverage   | Peptides | Coverage   | Peptides |                                                                                                          |
|            |          | 55.3       | 6        | OTTHUMP00000029979                                                                                       |
|            |          | 50         | 6        | Profilin 1                                                                                               |
|            |          | 39.2       | 28       | Splice Isoform 1 Of Cofilin, muscle isoform                                                              |
|            |          | 35.8       | 16       | PREDICTED: similar to Eukaryotic translation initiation factor 5A (eIF-5A) (eIF-4D) (Rev-binding factor) |
|            |          | 35.7       | 2        | DJ423B22.4                                                                                               |
|            |          | 35.3       | 123      | Integrin beta-1 (Splice Isoform 1)                                                                       |
|            |          | 34.5       | 2        | Ribosomal pRotein S27-like pRotein                                                                       |
|            |          | 29.9       | 16       | HLA class I histocompatibility antigen, A-26 alpha chain                                                 |
|            |          | 28.9       | 2        | 60S acidic ribosomal protein P1                                                                          |
|            |          | 27.1       | 43       | HLA class I histocompatibility antigen, A-23 alpha chain                                                 |
|            |          | 26         | 47       | HLA class I histocompatibility antigen, A-74 alpha chain                                                 |
|            |          | 25.7       | 3        | CCG1-interacting factor B (Splice Isoform 1,2)                                                           |
|            |          | 24.1       | 4        | 18 kDa protein                                                                                           |
|            |          | 23.5       | 3        | OTTHUMP00000044880; PREDICTED: similar to 40S ribosomal protein S26; 13 kDa protein; 15 kDa protein      |
|            |          | 23.4       | 2        | Platelet-activating factor acetylhydrolase IB gamma subunit                                              |
|            |          | 19.4       | 2        | Rho-related GTP-binding protein RhoG                                                                     |
|            |          | 19.2       | 4        | Platelet-activating factor acetylhydrolase IB beta subunit                                               |
|            |          | 19.1       | 3        | Dynein light chain 2                                                                                     |

|             |          |                                                                                                    |
|-------------|----------|----------------------------------------------------------------------------------------------------|
| 17.9        | 4        | Secretory carrier-associated membrane protein 3 (Splice Isoform 1); 38 kDa protein; SCAMP3 protein |
| 17.8        | 2        | Protein C20orf27                                                                                   |
| 17          | 3        | BLOCK 23                                                                                           |
| 16.7        | 3        | Glutathione S-transferase P                                                                        |
| 16.7        | 2        | Hypothetical protein                                                                               |
| 16.2        | 3        | 29 kDa protein                                                                                     |
| 15.8        | 2        | UBA/UBX 33.3 kDa protein                                                                           |
| 15.6        | 2        | PREDICTED: similar to ribosomal protein L21 Ribosomal protein L21                                  |
| <b>15.5</b> | <b>3</b> | <b>Metalloproteinase inhibitor 2</b>                                                               |
| 15.2        | 6        | Rab GDP dissociation inhibitor alpha                                                               |
| 14.3        | 7        | Ribosomal pRotein L13a                                                                             |
| 14.3        | 2        | PREDICTED: similar to ribosomal protein L18a                                                       |
| 14.2        | 3        | Hypothetical protein BT2.1                                                                         |
| 14.1        | 3        | Histone H1x                                                                                        |
| 13.9        | 2        | Sam68deltaKH                                                                                       |
| 13.8        | 3        | Enigma protein, isoform 1                                                                          |
| 12.8        | 3        | Signal recognition particle 9kDa                                                                   |
| 12.6        | 3        | Cell division control protein 42 homolog (Splice Isoform 1); DJ224A6.1.2                           |
| 12.4        | 2        | Hypothetical protein FLJ11342                                                                      |
| 12.1        | 2        | Malate dehydrogenase, mitochondrial                                                                |
| 12          | 4        | Succinyl-CoA ligase [GDP-forming] alpha-chain, mitochondrial                                       |
| 11.7        | 2        | Acyl-protein thioesterase 1 (Splice Isoform 1,2)                                                   |
| 11.6        | 6        | JUP protein                                                                                        |
| 11.4        | 3        | PhosPhoglycerate mutase 1 (brain) 29 kDa protein                                                   |
| 11.3        | 2        | Tropomyosin alpha 4 chain (Splice Isoform 1,2)                                                     |
| 11.3        | 3        | OTTHUMP00000028841                                                                                 |
| 11          | 2        | Ras-GTPase-activating protein binding protein 2 (Splice Isoform 1,2)                               |
| 11          | 3        | CSRV314                                                                                            |
| 10.9        | 3        | Hypothetical protein DKFZp434C2415                                                                 |
| 10.7        | 2        | 34 kDa protein; ATP synthase gamma chain, mitochondrial (Splice Isoform 2)                         |
| 10.6        | 2        | Tropomyosin 1 alpha chain (Splice Isoform 1,3,4); Hypothetical protein FLJ16459                    |
| 10.2        | 7        | Myeloid-associated differentiation marker; Myeloid upregulated protein                             |
| 10          | 2        | Hypothetical protein DKFZp779G118; 12 kDa protein                                                  |
| 9.8         | 2        | F-actin capping protein alpha-1 subunit                                                            |
| 9.6         | 2        | C15orf19 protein                                                                                   |
| 9.5         | 3        | Cytosolic acyl coenzyme A thioester hydrolase (Splice Isoform 1-6)                                 |
| 9.3         | 2        | Succinyl-CoA ligase [GDP-forming] beta-chain, mitochondrial                                        |
| 8.4         | 3        | Caldesmon (Splice Isoform 1-5)                                                                     |
| 7.5         | 3        | DPYSL3 protein                                                                                     |
| 7.5         | 2        | TAGLN protein                                                                                      |
| 7.3         | 2        | LAP3 protein                                                                                       |
| 7.2         | 3        | TGF-beta receptor type I                                                                           |
| 7.2         | 2        | Vasodilator-stimulated phosphoprotein                                                              |
| 7.1         | 3        | DNAJB1 protein                                                                                     |
| 7.1         | 2        | DEK protein                                                                                        |
| 6.8         | 2        | Ras-related protein Ral-B; Hypothetical protein FLJ45773                                           |
| 6.5         | 3        | Alcohol dehydrogenase class III chi chain                                                          |
| 6.5         | 2        | KIAA0544 protein                                                                                   |
| 6.2         | 2        | TERF1-interacting nuclear factor 2 (Splice Isoform 1)                                              |
| 5.7         | 2        | Cadherin-11 (Splice Isoform 1)                                                                     |
| 5.6         | 2        | Transcription initiation factor IIF, alpha subunit                                                 |
| 5.3         | 2        | Splicing factor 3,3a subunit 1, 120kDa iSoform 2                                                   |
| 5.2         | 2        | Prolyl 4-hydroxylase alpha-1 subunit (Splice Isoform 1,2)                                          |
| 5.2         | 2        | Epsin 4 (Splice Isoform 1,2)                                                                       |
| 5.1         | 2        | Numb protein homolog (Splice Isoform 1-4)                                                          |
| 5           | 2        | Ubiquitin carboxyl-terminal hydrolase 5 (Splice Isoform 1,2)                                       |

|     |   |                                                                                             |
|-----|---|---------------------------------------------------------------------------------------------|
| 5   | 2 | Hypothetical protein FLJ21011                                                               |
| 4.9 | 2 | Nicastrin (Splice Isoform 1,2)                                                              |
| 4.4 | 3 | HSPC334 Protein-transport protein SEC31 variant                                             |
| 4.1 | 2 | Prolyl 4-hydroxylase alpha-2 subunit (Splice Isoform 1,2)                                   |
| 4.1 | 2 | Receptor-type tyrosine-protein phosphatase epsilon (Splice Isoform 1,2)                     |
| 4   | 2 | Nogo receptor-like 3                                                                        |
| 3.7 | 2 | Docking protein 1 (Splice Isoform 1)                                                        |
| 3.6 | 2 | HIV TAT specific factor 1                                                                   |
| 3.4 | 2 | Low-density lipoprotein receptor-related protein 8 (Splice Isoform 1,4)                     |
| 3.4 | 2 | Rho-GTPase-activating protein 1                                                             |
| 3.1 | 2 | Semaphorin 3E                                                                               |
| 2.3 | 2 | Puromycin-sensitive aminopeptidase PREDICTED: similar to aminopeptidase puromycin sensitive |
| 1.8 | 2 | Splice Isoform 2 Of ADAM 9                                                                  |
| 1.6 | 2 | Stabilin 2                                                                                  |
| 1.5 | 2 | Myosin heavy chain                                                                          |
| 1.5 | 2 | Alpha 3 type VI collAgen isoform 2                                                          |
| 1.3 | 2 | Myosin heavy chain, skeletal muscle, extraocular                                            |
| 1.1 | 2 | Homerin                                                                                     |
| 0.9 | 2 | Polycystin 1 (Splice Isoform 1-3); Polycystic kidney disease-associated protein             |
| 0.7 | 2 | Axonemal dynein heavy chain 8 515 kDa protein                                               |
| 0.2 | 2 | Ovarian cancer related tumor marker CA125                                                   |

| HT-hi/diss   |           | HT-lo/diss |          | Protein Identified                                                                                                                                                                        |
|--------------|-----------|------------|----------|-------------------------------------------------------------------------------------------------------------------------------------------------------------------------------------------|
| Coverage     | Peptides  | Coverage   | Peptides |                                                                                                                                                                                           |
| 58.6         | 87.5      |            |          | Tubulin, beta, 5                                                                                                                                                                          |
| 34.45        | 25        |            |          | 29 kDa protein                                                                                                                                                                            |
| 32.45        | 7.5       |            |          | Ribosomal protein L10                                                                                                                                                                     |
| 30.55        | 11        |            |          | Tumor necrosis factor ligand superfamily member 7                                                                                                                                         |
| 29.65        | 3         |            |          | 16 kDa protein; UBC protein; Ubiquitin and ribosomal protein L40 ; Hypothetical protein FLJ46113; Hypothetical protein FLJ32377                                                           |
| 28.3         | 3.5       |            |          | Dpy-30-like protein                                                                                                                                                                       |
| 26.95        | 8         |            |          | PREDICTED: similar to 40S ribosomal protein SA (p40) (34/67 kDa laminin receptor) (Colon carcinoma laminin-binding protein) (NEM/1CHD4) (Multidrug resistance-associated protein MGR1-Ag) |
| 26.65        | 10.5      |            |          | 25 kDa protein                                                                                                                                                                            |
| 24.15        | 6         |            |          | SET protein (Splice Isoform 2)                                                                                                                                                            |
| 23.55        | 6         |            |          | High-mobility group box 2                                                                                                                                                                 |
| <b>23.1</b>  | <b>24</b> |            |          | <b>Neural cell adhesion molecule 1</b>                                                                                                                                                    |
| 19.1         | 3         |            |          | Inosine triphosphate pyrophosphatase                                                                                                                                                      |
| 18.9         | 9         |            |          | L-plastin                                                                                                                                                                                 |
| 16.8         | 5         |            |          | Putative GTP-binding protein PTD004 (Splice Isoform 1)                                                                                                                                    |
| 15.45        | 4.5       |            |          | 5C5                                                                                                                                                                                       |
| 15.2         | 3         |            |          | UPF0315 protein                                                                                                                                                                           |
| 14.8         | 5         |            |          | Protein arginine N-methyltransferase 1 (Splice Isoform 1-3)                                                                                                                               |
| 14.1         | 3         |            |          | Protein-L-isoaspartate (Splice Isoform 2); Protein-L-isoaspartate (D-aspartate) O-methyltransferase                                                                                       |
| <b>14.05</b> | <b>11</b> |            |          | <b>Tissue factor</b>                                                                                                                                                                      |
| 14           | 2.5       |            |          | Synaptic vesicle membrane protein VAT-1 homolog                                                                                                                                           |
| 13.4         | 4         |            |          | ATP synthase oligomycin sensitivity conferral protein, mitochondrial                                                                                                                      |
| 13.3         | 3         |            |          | Vacuolar ATP synthase subunit B, brain isoform                                                                                                                                            |
| 13.25        | 3         |            |          | Probable ATP-dependent RNA helicase p54                                                                                                                                                   |
| 13           | 11        |            |          | Vinculin isoform VCL                                                                                                                                                                      |
| 12.15        | 2.5       |            |          | Acetolactate synthase                                                                                                                                                                     |
| 11.5         | 2.5       |            |          | Thioredoxin-dependent peroxide reductase, mitochondrial Peroxiredoxin 3 isoform b                                                                                                         |
| 11.3         | 11        |            |          | Dystroglycan                                                                                                                                                                              |
| 10.9         | 2         |            |          | PREDICTED: protein phosphatase 1, regulatory (inhibitor) subunit 14B                                                                                                                      |
| 10.85        | 2         |            |          | Eukaryotic peptide chain release factor subunit 1                                                                                                                                         |

|            |            |                                                                                                                       |
|------------|------------|-----------------------------------------------------------------------------------------------------------------------|
| 10.65      | 3.5        | TSAP6 protein Hypothetical protein DKFZp686H07150 51 kDa protein                                                      |
| 10.65      | 7.5        | Importin beta-1 subunit                                                                                               |
| 10.35      | 2.5        | Vacuolar ATP synthase subunit B, kidney isoform ATPase, H+ transporting, lysosomal 56/58kD, V1 subunit B, isoform 1   |
| 9.95       | 4.5        | Multifunctional protein ADE2                                                                                          |
| 9.95       | 2.5        | Mitochondrial 28S ribosomal protein S29                                                                               |
| 9.9        | 4.5        | Ribonucleoside-diphosphate reductase M1 chain                                                                         |
| 9.85       | 3          | Transmembrane 9 superfamily protein member 3                                                                          |
| 9.8        | 5.5        | Nascent polypeptide associated complex alpha subunit                                                                  |
| 9.6        | 3          | Heterogeneous nuclear ribonucleoprotein Q (Splice Isoform 2,4)                                                        |
| 9.25       | 2.5        | Alpha enolase, lung specific                                                                                          |
| 9.05       | 3.5        | Transketolase                                                                                                         |
| 8.9        | 8          | Leucine-rich repeats and immunoglobulin-like domains protein 1 (Splice Isoform 1,2) Leucine-rich repeat protein LRIG1 |
| 8.55       | 3.5        | Hyaluronidase 2                                                                                                       |
| 8.35       | 4          | Podocalyxin-like protein                                                                                              |
| 8.3        | 3.5        | TGF-beta receptor type II (Splice Isoform 1,2)                                                                        |
| 8          | 6.5        | Large neutral amino acids transporter small subunit 1                                                                 |
| 7.8        | 4.5        | DNA replication licensing factor MCM4                                                                                 |
| <b>7.3</b> | <b>2.5</b> | <b>Junctional adhesion molecule 3</b>                                                                                 |
| 7.3        | 3          | Heat shock protein 75 kDa, mitochondrial                                                                              |
| 6.5        | 2.5        | Zinc phosphodiesterase ELAC protein 2 (Splice Isoform 1)                                                              |
| 6.35       | 2.5        | Ubiquitin thiolesterase protein OTUB1 (Splice Isoform 2)                                                              |
| 6.25       | 5.5        | Ectonucleotidase pyrophosphatase/phosphodiesterase 1                                                                  |
| 6.1        | 5.5        | Roundabout homolog 1 (Splice Isoform 1-3)                                                                             |
| 6          | 3.5        | KIAA1265 protein                                                                                                      |
| 5.95       | 6          | Receptor-type tyrosine-protein phosphatase F                                                                          |
| 5.1        | 2          | Steroid dehydrogenase homolog                                                                                         |
| 5.1        | 2.5        | LAG1 longevity assurance homolog 2                                                                                    |
| 4.7        | 3.5        | Iron-responsive element binding protein 1                                                                             |
| 4.7        | 2.5        | SEC23 interacting protein (Splice Isoform 1,2)                                                                        |
| 4.7        | 3          | C1-tetrahydrofolate synthase                                                                                          |
| 4.6        | 2          | Acyl-CoA dehydrogenase, very-long-chain specific, mitochondrial (Splice Isoform 1,2)                                  |
| 4.45       | 3.5        | Tripeptidyl peptidase II                                                                                              |
| 4.45       | 2          | Cysteinyl-tRNA synthetase (Splice Isoform 1,2)                                                                        |
| 4.35       | 2          | Lamin B1                                                                                                              |
| 4.15       | 3          | Niemann-Pick C1 protein                                                                                               |
| 3.55       | 3          | Amyloid beta A4 protein (Splice Isoform 1,3-10)                                                                       |
| 3.5        | 2.5        | Receptor protein tyrosine kinase variant EphB4v1; Ephrin type-B receptor 4                                            |
| 3.35       | 3.5        | PREDICTED: similar to Transmembrane protein 16F                                                                       |
| 3.15       | 3          | AXL receptor tyrosine kinase, isoform 1                                                                               |
| 3.1        | 2          | Microtubule-associated protein 4 (Splice Isoform 2,4); Microtubule-associated protein 4 isoform 2                     |
| 3.05       | 4.5        | Insulin-like growth factor I receptor                                                                                 |
| 2.85       | 3          | Receptor-type tyrosine-protein phosphatase mu                                                                         |
| 2.5        | 2.5        | PREDICTED: G2 protein                                                                                                 |
| 2.4        | 5.5        | Neurogenic locus notch homolog protein 2 ; Notch homolog 2                                                            |
